# Supplementary material for: PD-L1 Expression and CD8+ T Cell Infiltration Predict a Favorable Prognosis in Advanced Gastric Cancer
Source: Hindawi journal article supplement (doi:10.1155/2018/4180517), 2018-05-29
Supplement: f1 [file 4180517.f1.pdf]

Supplementary Table S1: Correlation between PD-1 expression and clinicopathological characteristics in AGC patients.

| Clinicopathological features | Cases | PD-1 expression |            | P-value( $\chi^2$ test) |
|------------------------------|-------|-----------------|------------|-------------------------|
|                              |       | High<br>58      | Low<br>451 |                         |
| <b>Gender</b>                |       |                 |            |                         |
| Male                         | 347   | 43              | 304        | 0.3002                  |
| Female                       | 162   | 15              | 147        |                         |
| <b>Age(years)</b>            |       |                 |            |                         |
| ≤60                          | 224   | 25              | 199        | 0.8828                  |
| > 60                         | 285   | 33              | 252        |                         |
| <b>Tumor location</b>        |       |                 |            |                         |
| Up                           | 73    | 8               | 65         | 0.5121                  |
| Middle                       | 105   | 8               | 97         |                         |
| Low                          | 260   | 35              | 225        |                         |
| Total                        | 66    | 7               | 59         |                         |
| Remnant                      | 5     | 0               | 5          |                         |
| <b>Length-diameter</b>       |       |                 |            |                         |
| < 5cm                        | 232   | 22              | 210        | 0.2141                  |
| ≥5cm                         | 277   | 36              | 241        |                         |
| <b>Lauren type</b>           |       |                 |            |                         |
| Intestinal                   | 163   | 13              | 150        | 0.2392                  |
| Diffuse                      | 326   | 42              | 284        |                         |
| Mix                          | 20    | 3               | 17         |                         |
| <b>Blood-vessel invasion</b> |       |                 |            |                         |
| absent                       | 413   | 43              | 370        | 0.1476                  |
| present                      | 96    | 15              | 81         |                         |
| <b>Perineuronal invasion</b> |       |                 |            |                         |
| absent                       | 429   | 43              | 386        | 0.0241*                 |
| present                      | 80    | 15              | 65         |                         |
| <b>pT stage</b>              |       |                 |            |                         |
| T2                           | 85    | 10              | 75         | 0.8254                  |
| T3                           | 151   | 19              | 132        |                         |
| T4                           | 273   | 29              | 244        |                         |
| <b>pN stage</b>              |       |                 |            |                         |
| N0                           | 162   | 17              | 145        | 0.9415                  |
| N1                           | 96    | 12              | 84         |                         |
| N2                           | 112   | 12              | 100        |                         |
| N3                           | 139   | 17              | 122        |                         |
| <b>TNM stage</b>             |       |                 |            |                         |
| I                            | 49    | 4               | 45         | 0.7542                  |
| II                           | 172   | 20              | 152        |                         |
| III                          | 288   | 34              | 254        |                         |

\* :  $P < 0.05$  , \*\* :  $P < 0.01$  ;

Supplementary Table S2: Correlation between CD3 expression and clinicopathological characteristics in AGC patients.

| Clinicopathological features | Cases | CD3 expression |            | P-value( $\chi^2$ test) |
|------------------------------|-------|----------------|------------|-------------------------|
|                              |       | High<br>254    | Low<br>255 |                         |
| <b>Gender</b>                |       |                |            |                         |
| Male                         | 347   | 173            | 174        | 0.9758                  |
| Female                       | 162   | 81             | 81         |                         |
| <b>Age(years)</b>            |       |                |            |                         |
| ≤60                          | 224   | 121            | 103        | 0.0996                  |
| > 60                         | 285   | 133            | 152        |                         |
| <b>Tumor location</b>        |       |                |            |                         |
| Up                           | 73    | 41             | 32         | 0.2202                  |
| Middle                       | 105   | 43             | 62         |                         |
| Low                          | 260   | 131            | 129        |                         |
| Total                        | 66    | 37             | 29         |                         |
| Remnant                      | 5     | 2              | 3          |                         |
| <b>Length-diameter</b>       |       |                |            |                         |
| < 5cm                        | 232   | 117            | 115        | 0.8907                  |
| ≥5cm                         | 277   | 138            | 139        |                         |
| <b>Lauren type</b>           |       |                |            |                         |
| Intestinal                   | 163   | 67             | 96         | 0.0243*                 |
| Diffuse                      | 326   | 176            | 150        |                         |
| Mix                          | 20    | 11             | 9          |                         |
| <b>Blood-vessel invasion</b> |       |                |            |                         |
| absent                       | 413   | 206            | 207        | 0.9830                  |
| present                      | 96    | 48             | 48         |                         |
| <b>Perineuronal invasion</b> |       |                |            |                         |
| absent                       | 429   | 214            | 215        | 0.9847                  |
| present                      | 80    | 40             | 40         |                         |
| <b>pT stage</b>              |       |                |            |                         |
| T2                           | 85    | 41             | 44         | 0.9445                  |
| T3                           | 151   | 76             | 75         |                         |
| T4                           | 273   | 137            | 136        |                         |
| <b>pN stage</b>              |       |                |            |                         |
| N0                           | 162   | 75             | 87         | 0.3927                  |
| N1                           | 96    | 55             | 41         |                         |
| N2                           | 112   | 56             | 56         |                         |
| N3                           | 139   | 68             | 71         |                         |
| <b>TNM stage</b>             |       |                |            |                         |
| I                            | 49    | 21             | 28         | 0.5837                  |
| II                           | 172   | 87             | 85         |                         |
| III                          | 288   | 146            | 142        |                         |

\* :  $P < 0.05$  , \*\* :  $P < 0.01$  ;

Supplementary Table S3: Correlation between CD8 expression and clinicopathological characteristics in AGC patients.

| Clinicopathological features | Cases | CD8 expression |            | P-value( $\chi^2$ test) |
|------------------------------|-------|----------------|------------|-------------------------|
|                              |       | High<br>254    | Low<br>255 |                         |
| <b>Gender</b>                |       |                |            |                         |
| Male                         | 347   | 173            | 174        | 0.9758                  |
| Female                       | 162   | 81             | 81         |                         |
| <b>Age(years)</b>            |       |                |            |                         |
| ≤60                          | 224   | 114            | 110        | 0.6918                  |
| > 60                         | 285   | 140            | 145        |                         |
| <b>Tumor location</b>        |       |                |            |                         |
| Up                           | 73    | 44             | 29         | 0.0859                  |
| Middle                       | 105   | 45             | 60         |                         |
| Low                          | 260   | 124            | 136        |                         |
| Total                        | 66    | 39             | 27         |                         |
| Remnant                      | 5     | 2              | 3          |                         |
| <b>Length-diameter</b>       |       |                |            |                         |
| < 5cm                        | 232   | 112            | 120        | 0.5020                  |
| ≥5cm                         | 277   | 142            | 135        |                         |
| <b>Lauren type</b>           |       |                |            |                         |
| Intestinal                   | 163   | 71             | 92         | 0.1171                  |
| Diffuse                      | 326   | 171            | 155        |                         |
| Mix                          | 20    | 12             | 8          |                         |
| <b>Blood-vessel invasion</b> |       |                |            |                         |
| absent                       | 413   | 211            | 202        | 0.2663                  |
| present                      | 96    | 43             | 53         |                         |
| <b>Perineuronal invasion</b> |       |                |            |                         |
| absent                       | 429   | 211            | 218        | 0.4534                  |
| present                      | 80    | 43             | 37         |                         |
| <b>pT stage</b>              |       |                |            |                         |
| T2                           | 85    | 36             | 49         | 0.3008                  |
| T3                           | 151   | 79             | 72         |                         |
| T4                           | 273   | 139            | 134        |                         |
| <b>pN stage</b>              |       |                |            |                         |
| N0                           | 162   | 84             | 78         | 0.0242*                 |
| N1                           | 96    | 59             | 37         |                         |
| N2                           | 112   | 46             | 66         |                         |
| N3                           | 139   | 65             | 74         |                         |
| <b>TNM stage</b>             |       |                |            |                         |
| I                            | 49    | 21             | 28         | 0.3073                  |
| II                           | 172   | 93             | 79         |                         |
| III                          | 288   | 140            | 148        |                         |

\* :  $P < 0.05$  , \*\* :  $P < 0.01$  ;

Supplementary Table S4: Correlation between FOXP3 expression and clinicopathological characteristics in AGC patients.

| Clinicopathological features | Cases | FOXP3 expression |            | P-value( $\chi^2$ test) |
|------------------------------|-------|------------------|------------|-------------------------|
|                              |       | High<br>97       | Low<br>412 |                         |
| <b>Gender</b>                |       |                  |            |                         |
| Male                         | 347   | 71               | 276        | 0.2378                  |
| Female                       | 162   | 26               | 136        |                         |
| <b>Age(years)</b>            |       |                  |            |                         |
| ≤60                          | 224   | 38               | 186        | 0.2865                  |
| > 60                         | 285   | 59               | 226        |                         |
| <b>Tumor location</b>        |       |                  |            |                         |
| Up                           | 73    | 10               | 63         | 0.3760                  |
| Middle                       | 105   | 19               | 86         |                         |
| Low                          | 260   | 57               | 203        |                         |
| Total                        | 66    | 11               | 55         |                         |
| Remnant                      | 5     | 0                | 5          |                         |
| <b>Length-diameter</b>       |       |                  |            |                         |
| < 5cm                        | 232   | 49               | 183        | 0.2780                  |
| ≥5cm                         | 277   | 48               | 229        |                         |
| <b>Lauren type</b>           |       |                  |            |                         |
| Intestinal                   | 163   | 26               | 137        | 0.3831                  |
| Diffuse                      | 326   | 68               | 258        |                         |
| Mix                          | 20    | 3                | 17         |                         |
| <b>Blood-vessel invasion</b> |       |                  |            |                         |
| absent                       | 413   | 80               | 333        | 0.7088                  |
| present                      | 96    | 17               | 79         |                         |
| <b>Perineuronal invasion</b> |       |                  |            |                         |
| absent                       | 429   | 82               | 347        | 0.9393                  |
| present                      | 80    | 15               | 65         |                         |
| <b>pT stage</b>              |       |                  |            |                         |
| T2                           | 85    | 17               | 68         | 0.9626                  |
| T3                           | 151   | 29               | 122        |                         |
| T4                           | 273   | 51               | 222        |                         |
| <b>pN stage</b>              |       |                  |            |                         |
| N0                           | 162   | 35               | 127        | 0.8005                  |
| N1                           | 96    | 17               | 79         |                         |
| N2                           | 112   | 20               | 92         |                         |
| N3                           | 139   | 25               | 114        |                         |
| <b>TNM stage</b>             |       |                  |            |                         |
| I                            | 49    | 12               | 37         | 0.5844                  |
| II                           | 172   | 31               | 141        |                         |
| III                          | 288   | 54               | 234        |                         |

\* :  $P < 0.05$  , \*\* :  $P < 0.01$  ;
